# Supplementary material for: Turnerbactin, a Novel Triscatecholate Siderophore from the Shipworm Endosymbiont Teredinibacter turnerae T7901
Source: PubMed Central journal article supplement (PMC3795760; doi:10.1371/journal.pone.0076151), 2013-10-11
Supplement: pone.0076151.s047.pdf [file pone.0076151.s047.pdf]

**Supporting Information**

**Table S1.**

| Position   | (DHB-Orn-Ser) <sub>2</sub> (2)                                   |       |                     | Dehydrated (DHB-Orn-Ser) <sub>2</sub> (4) |                                                                  |       |                                  | Dehydrated (DHB-Orn-Ser) <sub>3</sub> (5) |                                                                                                   |       |                                                              |
|------------|------------------------------------------------------------------|-------|---------------------|-------------------------------------------|------------------------------------------------------------------|-------|----------------------------------|-------------------------------------------|---------------------------------------------------------------------------------------------------|-------|--------------------------------------------------------------|
|            | δH (J in Hz)                                                     | HSQC  | HMBC                | δC                                        | δH (J in Hz)                                                     | TOCSY | HMBC                             | δC                                        | δH (J in Hz)                                                                                      | TOCSY | HMBC                                                         |
| DHB        |                                                                  |       |                     |                                           |                                                                  |       |                                  |                                           |                                                                                                   |       |                                                              |
| 1, 1', 1'' |                                                                  |       | 169                 | 170.78;<br>170.88                         |                                                                  |       |                                  | 170.74;<br>170.88;<br>170.98              |                                                                                                   |       |                                                              |
| 2, 2', 2'' |                                                                  |       | 116                 | 117.21;<br>117.06                         |                                                                  |       |                                  | 117.21;<br>117.16;<br>117.01              |                                                                                                   |       |                                                              |
| 3, 3', 3'' |                                                                  |       | 147.7               | 149.49;<br>149.37                         |                                                                  |       |                                  | 149.33;<br>149.36;<br>149.50              |                                                                                                   |       |                                                              |
| 4, 4', 4'' |                                                                  |       | 145.7               | 147.26;<br>147.17                         |                                                                  |       |                                  | 147.24;<br>147.15                         |                                                                                                   |       |                                                              |
| 5, 5', 5'' | 6.98, dd<br>(1.6, 2.4),<br>[1H]; 6.97,<br>dd (1.6, 2.4),<br>[1H] | 118.6 | 2, 3, 4,<br>6, 7    | 119.93;<br>119.86                         | 6.99, dd<br>(8.0, 1.6),<br>[1H]; 6.95,<br>dd (8.0, 1.6),<br>[1H] | 6, 7  | 2, 3, 4,<br>6; 2',<br>3', 4', 6' | 119.97;<br>119.91;<br>119.90              | 6.95, dd<br>(1.6, 8.0),<br>[1H]; 6.93,<br>dd (0.8, 8.0),<br>[1H]; 6.99,<br>dd (1.6, 8.0),<br>[1H] | 6, 7  | 2, 3, 4,<br>6; 2',<br>3', 4',<br>6; 2'',<br>3'', 4'',<br>6'' |
| 6, 6', 6'' | 6.77, t (8.0)<br>[2H]                                            | 118.8 | 1, 2, 3,<br>4, 5, 7 | 120.00;<br>119.89                         | 6.78, t (8.0),<br>[2H]; 6.72, t<br>(8.0), [2H]                   | 5, 7  | 2, 3, 4,<br>5, 7                 | 120.04;<br>120.03                         | 6.72, q (8.0),<br>[2H]; 6.77, t<br>(8.0), [1H]                                                    | 5, 7  | 2, 3, 4,<br>5, 7                                             |
| 7, 7', 7'' | 7.38, dd<br>(1.6, 8.0),<br>[1H]; 7.36,<br>dd (1.6, 8.0),<br>[1H] | 118.4 | 1, 3, 4,<br>5, 6    | 119.71;<br>119.66                         | 7.37, dd<br>(8.0, 1.6),<br>[1H]; 7.31,<br>dd (8.0, 0.8),<br>[1H] | 5, 6  | 1, 3, 4,<br>6; 1',<br>3', 4', 6' | 119.81;<br>119.76;<br>119.69              | 7.33, dd<br>(0.8, 8.0),<br>[1H]; 7.30,<br>dd (0.8, 8.0),<br>[1H]; 7.36,<br>dd (0.8, 8.0),         | 5, 6  | 1, 3, 4,<br>6; 1',<br>3', 4',<br>6; 1'',<br>3'', 4'',<br>6'' |

|                 |                                    |       |                     |                   |                                    |                            |                                     |                              |                                    |               |                                     |
|-----------------|------------------------------------|-------|---------------------|-------------------|------------------------------------|----------------------------|-------------------------------------|------------------------------|------------------------------------|---------------|-------------------------------------|
|                 |                                    |       |                     |                   |                                    |                            |                                     |                              | [1H]                               |               |                                     |
| Ornithine       |                                    |       |                     |                   |                                    |                            |                                     |                              |                                    |               |                                     |
| 8, 8', 8"       |                                    |       | 172.2;<br>172.0     | 173.67;<br>172.27 |                                    |                            |                                     | 173.66;<br>173.89;<br>172.23 |                                    |               |                                     |
| 9               | 4.79, m [1H]                       | 51.93 | 1, 8,<br>10, 11     | 54.37             | 4.82, m,<br>[1H]                   | 10, 11,<br>12              | 1, 8,<br>10, 11                     | 53.95                        | 4.75, m,<br>[1H]                   | 10, 11,<br>12 | 1, 8,<br>10, 11                     |
| 9'              | 4.76, m,<br>[1H]                   | 52.53 | 1', 8',<br>10', 11' | 53.94             | 4.73, m,<br>[1H]                   | 10', 11',<br>12'           | 1', 8',<br>10', 11'                 | 54.09                        | 4.67, m,<br>[1H]                   |               | 1', 8',<br>10', 11'                 |
| 9"              |                                    |       |                     |                   |                                    |                            |                                     | 54.41                        | 4.84, m,<br>[1H]                   |               | 1", 8",<br>10",<br>11"              |
| 10, 10',<br>10" | 2.05, m,<br>[2H]; 1.88,<br>m, [2H] | 28.8  | 8, 9,<br>11, 12     | 29.89;<br>29.78   | 2.07, m,<br>[2H]; 1.92,<br>m, [2H] | 9, 11,<br>12; 9,<br>11, 12 | 8, 9,<br>11, 12;<br>8, 9,<br>11, 12 | 29.99;<br>29.79;<br>29.70    | 2.05, m,<br>[3H]; 1.89,<br>m, [3H] | 9, 11,<br>12  | 8, 9,<br>11, 12;<br>8, 9,<br>11, 12 |
| 11, 11',<br>11" | 1.81, m [4H]                       | 23.5  | 9, 10,<br>12        | 25.03,<br>24.97   | 1.82, m,<br>[4H]                   | 9, 10,<br>12               | 9, 10,<br>12                        | 25.09;<br>25.01;<br>25.00    | 1.83, m,<br>[3H]; 1.79,<br>m, [3H] | 9, 10,<br>12  | 9, 10,<br>12; 9,<br>10, 12          |
| 12, 12',<br>12" | 2.99, m [4H]                       | 38.9  | 10, 11              | 40.30,<br>40.27   | 3.00, m,<br>[4H]                   | 9, 10,<br>11               | 10, 11                              | 40.31                        | 3.00, m,<br>[6H]                   | 9, 10,<br>11  | 10, 11                              |
| Serine          |                                    |       |                     |                   |                                    |                            |                                     |                              |                                    |               |                                     |
| 13              |                                    |       | 169.8               | 164.44            |                                    |                            |                                     | 164.4                        |                                    |               |                                     |
| 13'             |                                    |       | 170.7               | 172.23            |                                    |                            |                                     | 169.91                       |                                    |               |                                     |
| 13"             |                                    |       |                     |                   |                                    |                            |                                     | 172.29                       |                                    |               |                                     |
| 14              | 4.58, t (4.0,<br>4.8), [1H]        | 54.96 | 8, 13,<br>15        | 133.02            | 4.88, m,<br>[1H]                   |                            | 8', 13',<br>15'                     | 132.7                        |                                    |               |                                     |
| 14'             | 4.80, m,<br>[1H]                   | 51.97 | 8', 13',<br>15'     | 53.12             |                                    |                            |                                     | 52.99                        | 4.89, m,<br>[1H]                   | 15'           | 8', 13',<br>15'                     |
| 14"             |                                    |       |                     |                   |                                    |                            |                                     | 53.22                        | 4.82, m,<br>[1H]                   | 15"           | 8", 13",<br>15"                     |

|     |                                                        |       |                                  |        |                                                        |          |                                  |        |                                           |                       |                                             |
|-----|--------------------------------------------------------|-------|----------------------------------|--------|--------------------------------------------------------|----------|----------------------------------|--------|-------------------------------------------|-----------------------|---------------------------------------------|
| 15  | 3.95, dd (4.8, 12.0), [1H]; 3.82, dd (4.8, 11.2), [1H] | 61.23 | 13, 14;<br>13, 14                | 112.57 | 6.23, s, [1H];<br>5.90, s, [1H]                        | 15; 15   | 13, 14;<br>13, 14                | 112.81 | 6.12, s, [1H];<br>5.80, s, [1H]           | 15; 15                | 13, 14;<br>13, 14                           |
| 15' | 4.75, m, [1H]; 4.43, dd (4.8, 11.2), [1H]              | 64.04 | 13, 13',<br>14'; 13,<br>13', 14' | 66.09  | 4.68, dd (11.2, 6.4), [1H]; 4.53, dd (11.2, 6.4), [1H] | 15'; 15' | 13, 13',<br>14'; 13,<br>13', 14' | 65.32  | 4.56, m, [1H]; 4.53, m, [1H]              | 15', 14';<br>15', 14' | 13, 13',<br>14'; 13,<br>13', 14'            |
| 15" |                                                        |       |                                  |        |                                                        |          |                                  | 65.88  | 4.74, m, [1H]; 4.38, dd (6.4, 11.2), [1H] | 15", 14";<br>15", 14" | 13',<br>13",<br>14";<br>13',<br>13",<br>14" |
